# Supplementary material for: Schizophrenia-associated differential DNA methylation in brain is distributed across the genome and annotated to MAD1L1, a locus at which DNA methylation and transcription phenotypes share genetic variation with schizophrenia risk
Source: PubMed Central journal article supplement (PMC9392724; doi:10.1038/s41398-022-02071-0), 2022-08-20
Supplement: 41398_2022_2071_MOESM3_ESM.pdf [file 41398_2022_2071_MOESM3_ESM.pdf]

## Supplemental Figure 2

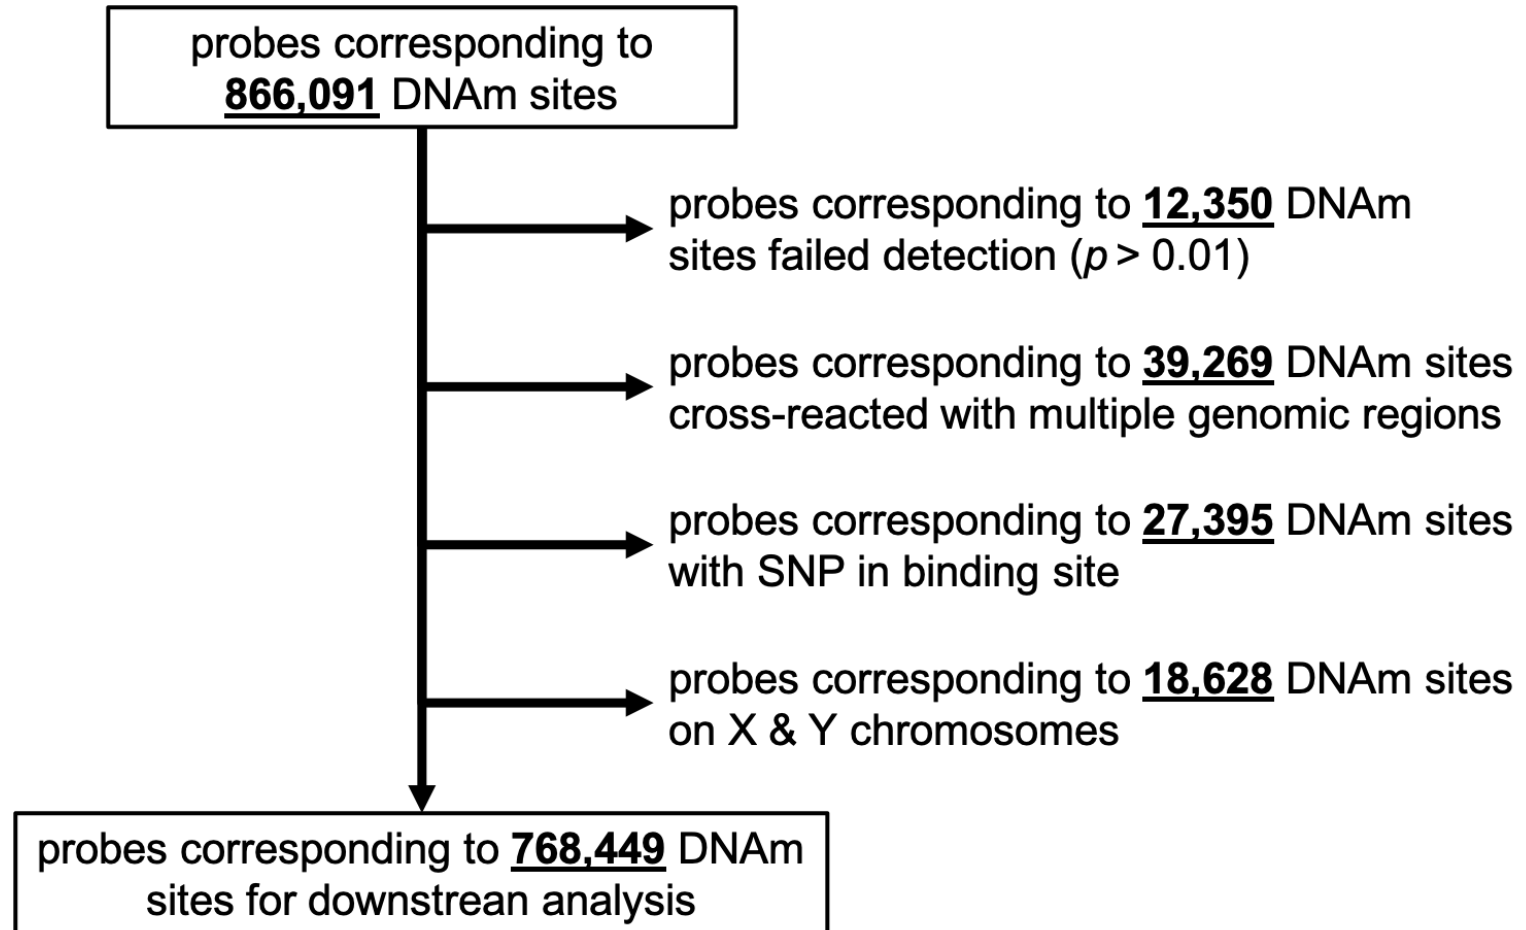

Supplemental Figure 2. Schematic representation of probe filtering.
