# Supplementary material for: Schizophrenia-associated differential DNA methylation in brain is distributed across the genome and annotated to MAD1L1, a locus at which DNA methylation and transcription phenotypes share genetic variation with schizophrenia risk
Source: PubMed Central journal article supplement (PMC9392724; doi:10.1038/s41398-022-02071-0), 2022-08-20
Supplement: 41398_2022_2071_MOESM4_ESM.pdf [file 41398_2022_2071_MOESM4_ESM.pdf]

## Supplemental Figure 3

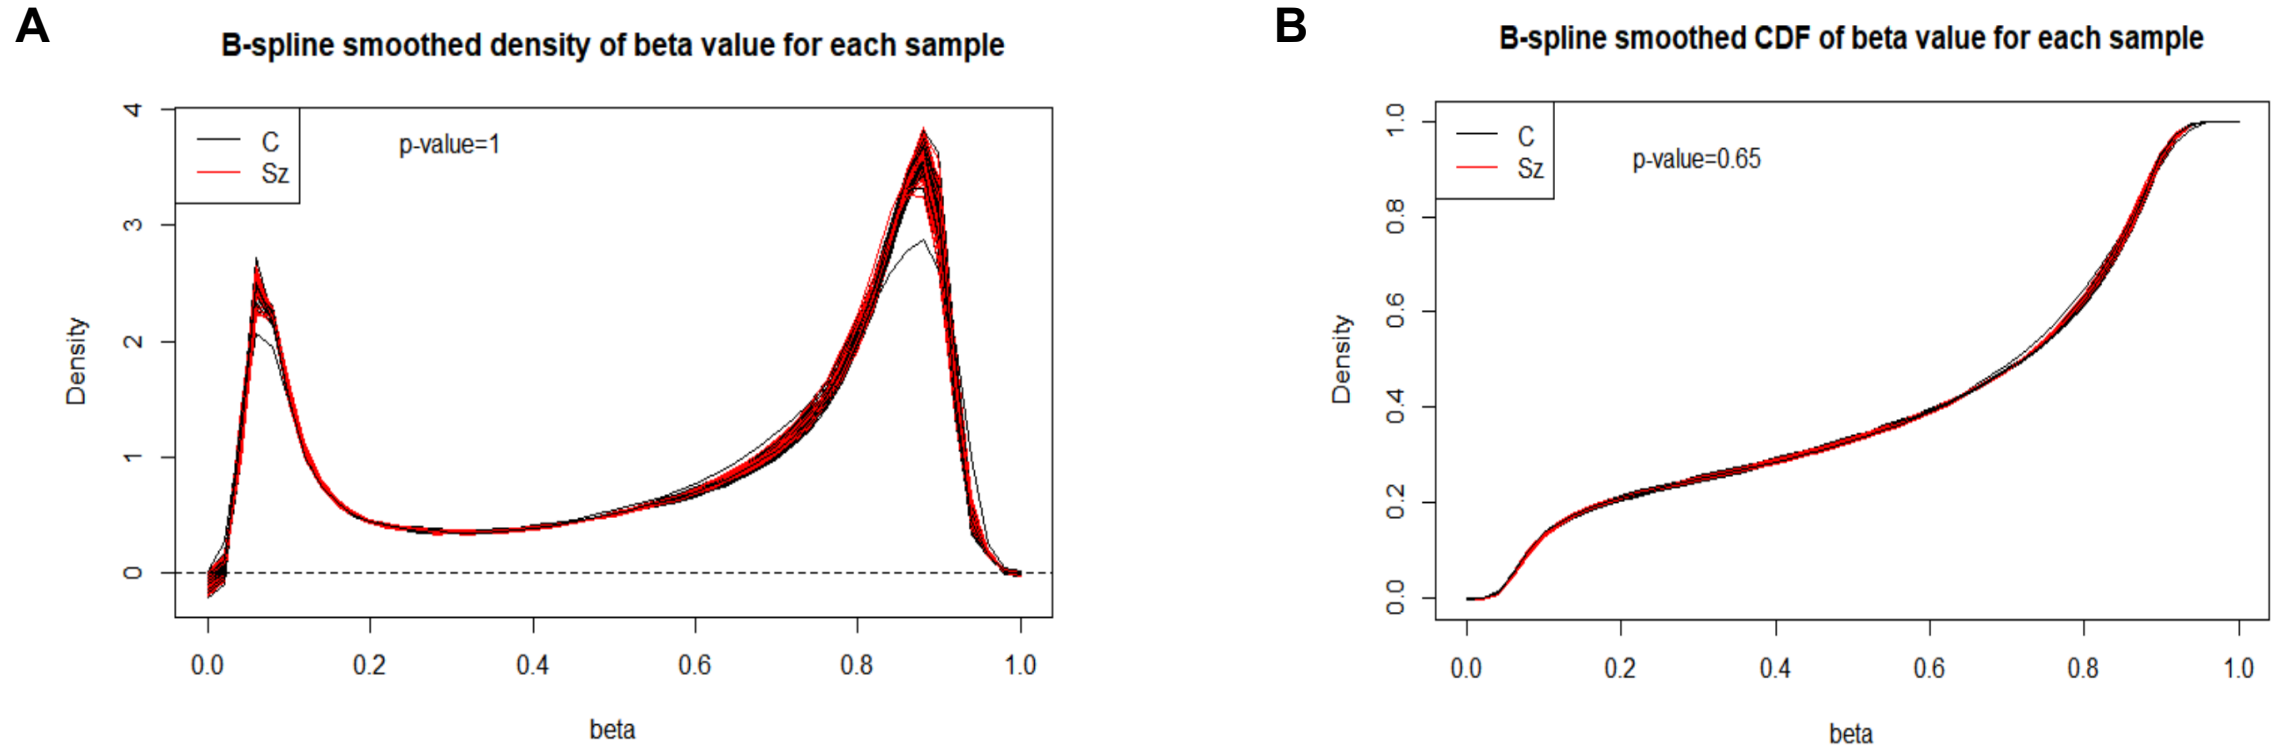

**Supplemental Figure 3. Global DNA methylation in schizophrenia and non-psychiatric comparison subjects.** Global DNA methylation does not differ between schizophrenia and non-psychiatric comparison subjects as assessed by comparison of B-spline smoothed **(A)** density distributions (SKAT-based test,  $p > 0.99$ ) and **(B)** cumulative density functions (CDF). (SKAT-based test,  $p = 0.65$ ). Sz, schizophrenia; C, non-psychiatric comparison.
