# Supplementary material for: Schizophrenia-associated differential DNA methylation in brain is distributed across the genome and annotated to MAD1L1, a locus at which DNA methylation and transcription phenotypes share genetic variation with schizophrenia risk
Source: PubMed Central journal article supplement (PMC9392724; doi:10.1038/s41398-022-02071-0), 2022-08-20
Supplement: 41398_2022_2071_MOESM5_ESM.pdf [file 41398_2022_2071_MOESM5_ESM.pdf]

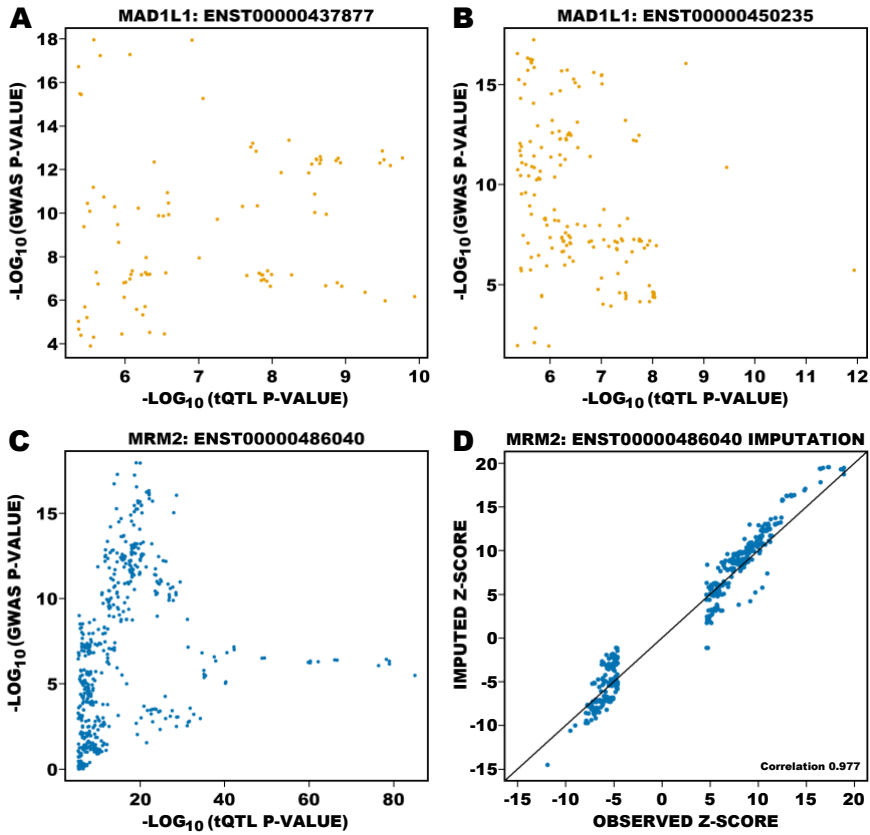

**Supplemental Figure 4. Colocalization Diagnostic Plots.** (A, B) Genome wide association study (GWAS) of schizophrenia (3) sites were plotted against transcript quantitative trait loci (tQTL; PsychEncode; 73) sites for two *MAD1L1* transcripts (yellow) and (C) one *MRM2* transcript (blue). (D) Z-Score imputation for *MRM2* transcript.
