# Supplementary material for: Schizophrenia-associated differential DNA methylation in brain is distributed across the genome and annotated to MAD1L1, a locus at which DNA methylation and transcription phenotypes share genetic variation with schizophrenia risk
Source: PubMed Central journal article supplement (PMC9392724; doi:10.1038/s41398-022-02071-0), 2022-08-20
Supplement: 41398_2022_2071_MOESM6_ESM.pdf [file 41398_2022_2071_MOESM6_ESM.pdf]

**Supplemental Table 1. Characteristics of human subjects.** Abbreviations: W, white; B, black; O, other (Asian Inidan); M, male; F, female; NPC, non-psychiatric comparison; SZ, schizophrenia; PMI, postmortem interval; ASCVD, athrosclerotic cardiovascular disease; CDO, combined drug overdose; GI, gastrointestinal; MVP, mitral valve prolapse; PE, pulmonary embolism.

| Brain Bank ID | Age | Race | Sex | Diagnostic Group | Cause of Death              | Manner of Death | PMI (hours) |
|---------------|-----|------|-----|------------------|-----------------------------|-----------------|-------------|
| 1326          | 58  | W    | M   | NPC              | ASCVD                       | Natural         | 16.4        |
| 1247          | 58  | W    | F   | NPC              | ASCVD                       | Natural         | 22.7        |
| 1086          | 51  | W    | M   | NPC              | ASCVD                       | Natural         | 24.2        |
| 1201          | 52  | W    | F   | NPC              | ASCVD                       | Natural         | 16.4        |
| 1255          | 37  | B    | M   | NPC              | PE                          | Natural         | 22.0        |
| 1480          | 62  | W    | M   | NPC              | ASCVD                       | Natural         | 20.1        |
| 1119          | 57  | W    | M   | NPC              | ASCVD                       | Natural         | 20.2        |
| 1317          | 56  | W    | M   | NPC              | ASCVD                       | Natural         | 22.9        |
| 1307          | 32  | B    | M   | NPC              | ASCVD                       | Natural         | 4.8         |
| 1067          | 49  | W    | M   | NPC              | ASCVD                       | Natural         | 6.0         |
| 1196          | 36  | W    | F   | NPC              | Asphyxiation                | Accidental      | 14.5        |
| 1099          | 24  | W    | F   | NPC              | Cardiomyopathy              | Natural         | 9.1         |
| 806           | 57  | W    | M   | NPC              | PE                          | Natural         | 24.0        |
| 739           | 40  | W    | M   | NPC              | ASCVD                       | Natural         | 15.8        |
| 822           | 28  | B    | M   | NPC              | ASCVD                       | Natural         | 25.3        |
| 727           | 19  | B    | M   | NPC              | Trauma                      | Accidental      | 7.0         |
| 659           | 46  | O    | M   | NPC              | Peritonitis                 | Accidental      | 22.2        |
| 852           | 54  | W    | M   | NPC              | Cardiac Tamponade           | Natural         | 8.0         |
| 685           | 56  | W    | M   | NPC              | Hypoplastic coronary artery | Natural         | 14.5        |
| 686           | 52  | W    | F   | NPC              | ASCVD                       | Natural         | 22.6        |
| 1092          | 40  | B    | F   | NPC              | MVP                         | Natural         | 16.6        |
| 1488          | 39  | B    | M   | NPC              | PE                          | Natural         | 21.5        |
| 1047          | 43  | W    | M   | NPC              | ASCVD                       | Natural         | 13.8        |
| 700           | 42  | W    | M   | NPC              | ASCVD                       | Natural         | 26.1        |
| 567           | 46  | W    | F   | NPC              | MVP                         | Natural         | 15.0        |
| 871           | 28  | W    | M   | NPC              | Trauma                      | Accidental      | 16.5        |
| 988           | 82  | W    | M   | NPC              | Trauma                      | Accidental      | 22.5        |
| 1284          | 55  | W    | M   | NPC              | ASCVD                       | Natural         | 6.4         |
| 1555          | 17  | W    | M   | NPC              | Trauma                      | Accidental      | 15.1        |
| 1268          | 49  | B    | M   | NPC              | ASCVD                       | Natural         | 19.9        |
| 1466          | 64  | B    | F   | NPC              | Trauma                      | Accidental      | 20.0        |
| 1386          | 46  | W    | M   | NPC              | ASCVD                       | Natural         | 21.2        |
| 1026          | 59  | W    | M   | NPC              | ASCVD                       | Natural         | 19.8        |

|       |    |   |   |     |                             |            |      |
|-------|----|---|---|-----|-----------------------------|------------|------|
| 1524  | 66 | W | M | NPC | Small intestinal infarction | Natural    | 9.4  |
| 1270  | 73 | W | F | NPC | Trauma                      | Accidental | 19.7 |
| 1372  | 37 | W | M | NPC | Asphyxiation                | Accidental | 20.5 |
| 1374  | 43 | W | M | NPC | ASCVD                       | Natural    | 21.7 |
| 1159  | 51 | W | M | NPC | ASCVD                       | Natural    | 16.7 |
| 857   | 48 | W | M | NPC | ASCVD                       | Natural    | 16.6 |
| 1391  | 51 | W | F | NPC | ASCVD                       | Natural    | 7.8  |
| 818   | 67 | W | F | NPC | Anaphylactic reaction       | Accidental | 24.0 |
| 630   | 65 | W | M | NPC | ASCVD                       | Natural    | 21.2 |
| 546   | 37 | W | F | NPC | ASCVD                       | Natural    | 23.5 |
| 681   | 51 | W | M | NPC | Hypertrophic cardiomyopathy | Natural    | 11.6 |
| 1453  | 62 | W | M | SZ  | Trama                       | Accidental | 11.1 |
| 1240  | 50 | B | F | SZ  | ASCVD                       | Natural    | 22.9 |
| 10025 | 52 | B | M | SZ  | ASCVD                       | Natural    | 27.1 |
| 1256  | 34 | W | M | SZ  | Hanging                     | Suicide    | 27.4 |
| 1189  | 47 | W | F | SZ  | CDO                         | Suicide    | 14.4 |
| 10020 | 38 | W | M | SZ  | Salicylate overdose         | Suicide    | 28.8 |
| 1263  | 62 | W | M | SZ  | Asphyxiation                | Accidental | 22.7 |
| 625   | 49 | B | M | SZ  | ASCVD                       | Natural    | 23.5 |
| 1173  | 62 | W | M | SZ  | ASCVD                       | Natural    | 22.9 |
| 1361  | 63 | W | M | SZ  | Cardiomyopathy              | Natural    | 23.2 |
| 10024 | 37 | B | M | SZ  | ASCVD                       | Natural    | 6.0  |
| 1296  | 48 | W | M | SZ  | Pneumonia                   | Natural    | 7.8  |
| 1211  | 41 | W | F | SZ  | Sudden unexpected death     | Natural    | 20.1 |
| 10023 | 25 | B | F | SZ  | Drowning                    | Suicide    | 20.1 |
| 665   | 59 | B | M | SZ  | Intestinal hemorrhage       | Natural    | 28.1 |
| 1088  | 49 | W | M | SZ  | CDO                         | Accidental | 21.5 |
| 787   | 27 | B | M | SZ  | Gunshot                     | Suicide    | 19.2 |
| 829   | 25 | W | M | SZ  | Salicylate overdose         | Suicide    | 5.0  |
| 930   | 47 | W | M | SZ  | ASCVD                       | Natural    | 15.3 |
| 722   | 45 | B | M | SZ  | Upper GI bleed              | Natural    | 9.1  |
| 1105  | 53 | W | M | SZ  | ASCVD                       | Natural    | 7.9  |
| 802   | 63 | W | F | SZ  | Right ventricular dysplasia | Natural    | 29.0 |
| 1010  | 44 | B | F | SZ  | Sudden unexpected death     | Natural    | 18.7 |
| 1222  | 32 | W | M | SZ  | CDO                         | Suicide    | 30.8 |

|       |    |   |   |    |                        |              |      |
|-------|----|---|---|----|------------------------|--------------|------|
| 933   | 44 | W | M | SZ | Myocarditis            | Natural      | 8.3  |
| 917   | 71 | W | F | SZ | ASCVD                  | Natural      | 23.8 |
| 537   | 37 | W | F | SZ | Hanging                | Suicide      | 14.5 |
| 878   | 33 | W | M | SZ | Myocardial fibrosis    | Natural      | 10.8 |
| 621   | 83 | W | M | SZ | Asphyxiation           | Accidental   | 16.0 |
| 1188  | 58 | W | M | SZ | ASCVD                  | Natural      | 7.7  |
| 1649  | 17 | B | M | SZ | Hanging                | Suicide      | 21.4 |
| 1230  | 50 | W | M | SZ | Doxepin overdose       | Suicide      | 16.9 |
| 1341  | 44 | W | F | SZ | Trauma                 | Accidental   | 24.5 |
| 1420  | 47 | W | M | SZ | Jumping                | Suicide      | 23.4 |
| 1542  | 65 | W | M | SZ | CDO                    | Undetermined | 17.4 |
| 566   | 63 | W | M | SZ | ASCVD                  | Natural      | 18.3 |
| 587   | 38 | B | F | SZ | Myocardial hypertrophy | Natural      | 17.8 |
| 1579  | 69 | W | F | SZ | ASCVD                  | Natural      | 16.1 |
| 1581  | 32 | W | M | SZ | ASCVD                  | Natural      | 18.4 |
| 10026 | 46 | W | F | SZ | Thermal injuries       | Suicide      | 23.8 |
| 1686  | 56 | B | M | SZ | ASCVD                  | Natural      | 14.1 |
| 904   | 33 | W | M | SZ | Bronchopneumonia       | Natural      | 28.0 |
| 1455  | 42 | W | M | SZ | Peritonitis            | Natural      | 8.2  |
| 1506  | 47 | W | F | SZ | CDO                    | Accidental   | 14.1 |
