# Supplementary material for: Schizophrenia-associated differential DNA methylation in brain is distributed across the genome and annotated to MAD1L1, a locus at which DNA methylation and transcription phenotypes share genetic variation with schizophrenia risk
Source: PubMed Central journal article supplement (PMC9392724; doi:10.1038/s41398-022-02071-0), 2022-08-20
Supplement: 41398_2022_2071_MOESM7_ESM.pdf [file 41398_2022_2071_MOESM7_ESM.pdf]

**Supplemental Table 2A. Neuronal proportion in SZ and NPC subjects.** Neuron proportion did not differ between STG samples from SZ and NPC subjects (two-sample t-test; p=0.50).

Abbreviations: NPC, non-psychiatric comparison; STG, superior temporal gyrus; SZ, schizophrenia.

| <b>Neuron Proportion</b>    | <b>SZ</b>        | <b>NPC</b>       |
|-----------------------------|------------------|------------------|
| Median (minimum-maximum)    | 0.45 (0.38-0.61) | 0.46 (0.37-0.59) |
| Median (standard deviation) | 0.46 (0.04)      | 0.46 (0.05)      |
