# Supplementary material for: Schizophrenia-associated differential DNA methylation in brain is distributed across the genome and annotated to MAD1L1, a locus at which DNA methylation and transcription phenotypes share genetic variation with schizophrenia risk
Source: PubMed Central journal article supplement (PMC9392724; doi:10.1038/s41398-022-02071-0), 2022-08-20
Supplement: 41398_2022_2071_MOESM8_ESM.pdf [file 41398_2022_2071_MOESM8_ESM.pdf]

**Supplemental Table 2B. Differentially methylated sites in SZ after adjusting for neuronal proportion.** The 256 sites at which DNAm differs between SZ and NPC subjects at the FDR cutoff of  $q=0.1$  (adjusted for age, race, PMI, and neuronal proportion) are listed in the table. Abbreviations: DNAm, DNA methylation; FDR, false discovery rate; NPC, non-psychiatric comparison; PMI, postmortem interval; SZ, schizophrenia

| Site       | DNAm Difference (SZ-NPC; $\beta$ -values) | q-value  | Gene             |
|------------|-------------------------------------------|----------|------------------|
| cg01712700 | -0.032                                    | 8.39E-05 | CAPN10           |
| cg13532802 | -0.041                                    | 9.36E-05 |                  |
| cg02113493 | -0.022                                    | 0.005    |                  |
| cg04020590 | -0.033                                    | 0.007    | GRTP1            |
| cg25079492 | -0.028                                    | 0.011    | CLEC16A          |
| cg05621596 | -0.018                                    | 0.012    | GRAMD4           |
| cg08847417 | -0.023                                    | 0.012    | ZNF827           |
| cg23453794 | -0.033                                    | 0.012    | MERTK            |
| cg08692211 | -0.021                                    | 0.018    | MEIS2            |
| cg23379913 | -0.026                                    | 0.018    | AKAP1            |
| cg07748741 | -0.012                                    | 0.019    | UBTD1            |
| cg24941703 | -0.027                                    | 0.019    | MAD1L1           |
| cg26981306 | -0.027                                    | 0.019    | KIAA0892         |
| cg04011474 | -0.028                                    | 0.020    |                  |
| cg22945957 | -0.027                                    | 0.020    | PSTPIP1          |
| cg22519912 | -0.027                                    | 0.026    | PSD2             |
| cg01606571 | -0.026                                    | 0.026    | HADHA            |
| cg02478836 | -0.021                                    | 0.026    | TBC1D22A         |
| cg06050636 | -0.034                                    | 0.026    | S100A13          |
| cg13913915 | -0.031                                    | 0.026    | MSI2             |
| cg18735473 | -0.020                                    | 0.026    | BRUNOL4          |
| cg21620968 | -0.029                                    | 0.026    | COPS7B           |
| cg22348992 | -0.016                                    | 0.026    | CHRNA4           |
| cg22689280 | -0.028                                    | 0.026    |                  |
| cg02289653 | -0.025                                    | 0.027    | EPB41L1          |
| cg10863857 | -0.024                                    | 0.027    | CELF2            |
| cg12349571 | -0.017                                    | 0.027    | TLE3             |
| cg13295422 | -0.030                                    | 0.027    | CELF2; CELF2-AS2 |
| cg14346040 | -0.018                                    | 0.027    | NR1D1            |
| cg19261949 | -0.023                                    | 0.027    | ZMAT5            |
| cg21265339 | -0.022                                    | 0.027    |                  |
| cg24158028 | -0.027                                    | 0.027    | STK32C           |
| cg18282392 | -0.019                                    | 0.029    | GALNT7           |
| cg25459000 | -0.017                                    | 0.031    | SYNGR1           |
| cg19418922 | -0.026                                    | 0.031    | EXT2             |
| cg03449456 | -0.020                                    | 0.031    | PRDM16           |
| cg02722031 | -0.027                                    | 0.032    | HERC3            |

|            |        |       |                   |
|------------|--------|-------|-------------------|
| cg08425757 | -0.013 | 0.032 | TRAPPC9           |
| cg12937501 | -0.025 | 0.033 |                   |
| cg14608424 | -0.025 | 0.033 | ABR               |
| cg17601209 | -0.031 | 0.033 | PRDM16            |
| cg00387200 | -0.027 | 0.035 |                   |
| cg09200437 | -0.018 | 0.035 |                   |
| cg10699522 | -0.028 | 0.035 | DST; LOC101930010 |
| cg15044372 | -0.023 | 0.035 |                   |
| cg23200394 | -0.033 | 0.035 | GLI2              |
| cg24920126 | -0.022 | 0.035 | PPP1R3G           |
| cg12446793 | -0.028 | 0.036 |                   |
| cg24883899 | -0.018 | 0.036 | APC2              |
| cg07348768 | -0.014 | 0.036 | PRDM16            |
| cg16901627 | -0.019 | 0.036 | COPE              |
| cg25894668 | -0.021 | 0.040 | SLC3A2            |
| cg13523224 | -0.031 | 0.043 | CFAP99            |
| cg20402747 | -0.019 | 0.044 | TBC1D16           |
| cg24512544 | -0.020 | 0.044 | EIF2C2            |
| cg25211200 | -0.025 | 0.044 | MRVI1             |
| cg21408848 | -0.026 | 0.046 | IQSEC1            |
| cg24318537 | -0.023 | 0.046 | UNC119B           |
| cg06022867 | -0.043 | 0.047 |                   |
| cg12449974 | -0.027 | 0.047 | CORO2B            |
| cg01203812 | -0.026 | 0.048 | PRDM16            |
| cg12713481 | -0.027 | 0.048 |                   |
| cg12590902 | -0.022 | 0.048 | ERI3              |
| cg18329758 | -0.027 | 0.048 | WWC1              |
| cg21946195 | -0.033 | 0.050 | ATOH8             |
| cg00772497 | -0.027 | 0.050 | GSTCD             |
| cg13689085 | -0.026 | 0.050 | TCF7              |
| cg00159552 | -0.018 | 0.051 | TBC1D22A          |
| cg00162902 | -0.019 | 0.051 | FAM184A           |
| cg00686823 | -0.024 | 0.051 | TPRA1             |
| cg01123449 | -0.026 | 0.051 | HHIPL1            |
| cg01287037 | -0.027 | 0.051 |                   |
| cg01433955 | -0.027 | 0.051 |                   |
| cg02347483 | -0.021 | 0.051 | CCDC101           |
| cg03595140 | -0.027 | 0.051 | FNBP1             |
| cg03932760 | -0.022 | 0.051 | ARRB1; MIR326     |
| cg04500745 | -0.017 | 0.051 | MAPK8IP3          |
| cg04633409 | 0.019  | 0.051 | TWF1              |
| cg05068943 | -0.019 | 0.051 | GOT1              |
| cg05501958 | -0.011 | 0.051 | APOE              |
| cg06317803 | 0.018  | 0.051 |                   |
| cg06847567 | 0.020  | 0.051 |                   |

|            |        |       |                    |
|------------|--------|-------|--------------------|
| cg07380086 | -0.025 | 0.051 | CHN1               |
| cg07597386 | -0.007 | 0.051 | PRDM16             |
| cg07605200 | -0.026 | 0.051 |                    |
| cg08196145 | -0.018 | 0.051 |                    |
| cg08209664 | -0.020 | 0.051 | ST3GAL1            |
| cg08256119 | -0.025 | 0.051 | MSI2               |
| cg08419879 | -0.017 | 0.051 | PLEKHG1            |
| cg09815962 | -0.026 | 0.051 | EIF2C2             |
| cg09925572 | -0.025 | 0.051 | TFCP2              |
| cg11197533 | -0.026 | 0.051 | IFT122             |
| cg12312611 | 0.027  | 0.051 | ARRDC5             |
| cg13136596 | -0.034 | 0.051 | MSI2               |
| cg14020176 | -0.020 | 0.051 | SLC9A3R1           |
| cg14366878 | 0.025  | 0.051 | SLC1A1             |
| cg14372037 | -0.029 | 0.051 | SORCS2             |
| cg14517390 | -0.019 | 0.051 | ACSBG1             |
| cg15165927 | -0.023 | 0.051 | NKD2               |
| cg15728120 | -0.017 | 0.051 | CENPT              |
| cg15748271 | -0.020 | 0.051 | TRIM8              |
| cg15845746 | -0.012 | 0.051 | TMEM177            |
| cg16266918 | -0.024 | 0.051 | PDXK               |
| cg16433632 | -0.013 | 0.051 | RAMP1              |
| cg17134838 | -0.022 | 0.051 |                    |
| cg17803589 | -0.023 | 0.051 | SLC19A1            |
| cg19788036 | -0.025 | 0.051 |                    |
| cg21785920 | -0.038 | 0.051 | LBP                |
| cg22548266 | -0.027 | 0.051 | SPOCK2             |
| cg22649529 | -0.033 | 0.051 | TECR               |
| cg23634532 | -0.022 | 0.051 | OGDH               |
| cg24338094 | -0.022 | 0.051 | PLXNA1             |
| cg25298833 | -0.027 | 0.051 | RGMA               |
| cg25601830 | -0.022 | 0.051 | AKR7A2             |
| cg26201596 | 0.026  | 0.051 |                    |
| cg26520908 | -0.028 | 0.051 | PRDM16             |
| cg26580673 | -0.020 | 0.051 |                    |
| cg26632239 | -0.014 | 0.051 | CTDP1              |
| cg27151770 | -0.021 | 0.051 | ZNF423             |
| cg27214458 | -0.013 | 0.051 | MRGPRF; MRGPRF-AS1 |
| cg21705669 | -0.017 | 0.052 | BCL6               |
| cg08213909 | -0.026 | 0.054 | MCC                |
| cg12128274 | 0.030  | 0.054 | CNOT4              |
| cg16023894 | -0.029 | 0.054 | EPHB2              |
| cg16622899 | 0.020  | 0.054 | MAFK               |
| cg26409376 | -0.032 | 0.054 |                    |
| cg07987705 | -0.022 | 0.054 | RGMA               |

|            |        |       |                |
|------------|--------|-------|----------------|
| cg18783374 | -0.022 | 0.054 | MSI2           |
| cg16011164 | -0.027 | 0.056 | MIR4656; AP5Z1 |
| cg17529670 | -0.022 | 0.056 | BCR            |
| cg14297573 | -0.032 | 0.058 | PFKP           |
| cg09255521 | -0.034 | 0.058 |                |
| cg01952185 | 0.019  | 0.059 |                |
| cg04677723 | -0.017 | 0.062 | MOGS           |
| cg04618897 | -0.028 | 0.066 | KIAA0415       |
| cg07303829 | -0.020 | 0.066 | SAPS2          |
| cg11548242 | -0.018 | 0.066 |                |
| cg11569621 | -0.019 | 0.066 |                |
| cg13821176 | -0.029 | 0.066 | TRIB1          |
| cg19736604 | -0.023 | 0.066 | TNXB           |
| cg22014398 | -0.019 | 0.066 | MGAT4B         |
| cg24484600 | -0.021 | 0.066 | GDPD5          |
| cg09788030 | -0.024 | 0.067 |                |
| cg02752163 | 0.045  | 0.068 |                |
| cg03629926 | -0.019 | 0.068 | ANGPTL4        |
| cg03649589 | -0.018 | 0.068 | CSGALNACT1     |
| cg07463740 | -0.025 | 0.068 |                |
| cg16187038 | -0.023 | 0.068 | RCOR1          |
| cg21126828 | -0.026 | 0.068 | RAI1           |
| cg25580656 | -0.024 | 0.068 | ZFYVE21        |
| cg23879743 | -0.018 | 0.068 |                |
| cg11301187 | -0.025 | 0.068 | KIAA0195       |
| cg05321174 | -0.014 | 0.068 | PTK2B          |
| cg26301507 | -0.018 | 0.068 | SLC25A20       |
| cg13259703 | -0.022 | 0.070 |                |
| cg20108328 | -0.023 | 0.070 | C21orf70       |
| cg19859445 | -0.022 | 0.070 |                |
| cg04792024 | -0.023 | 0.070 | TMEM120A       |
| cg07504768 | -0.021 | 0.070 | MTSS1L         |
| cg23564627 | -0.022 | 0.070 | PEMT           |
| cg24379495 | -0.021 | 0.073 | SLC1A2         |
| cg12985235 | -0.010 | 0.073 | MPND           |
| cg14335434 | -0.032 | 0.073 | PRKCH          |
| cg05071292 | -0.013 | 0.074 | LOC728613      |
| cg05927518 | -0.021 | 0.074 | TACC1          |
| cg15343406 | -0.037 | 0.074 |                |
| cg17196564 | -0.020 | 0.074 |                |
| cg19177744 | -0.023 | 0.074 |                |
| cg21036560 | -0.024 | 0.075 | PGBD5          |
| cg03628962 | -0.021 | 0.075 | RGMA           |
| cg03957687 | -0.023 | 0.075 | CENPT          |
| cg04594439 | -0.025 | 0.075 | PASK           |

|            |        |       |               |
|------------|--------|-------|---------------|
| cg07018888 | 0.017  | 0.075 | FOXN1         |
| cg09214323 | -0.023 | 0.075 | RNU6-2; KIF1B |
| cg13175786 | -0.021 | 0.075 | PRDM16        |
| cg17282060 | -0.012 | 0.075 | ARHGAP22      |
| cg17736422 | -0.033 | 0.075 | PRDM16        |
| cg24986651 | -0.024 | 0.075 | LPIN1         |
| cg26000554 | -0.023 | 0.075 | MOSC2         |
| cg26913155 | -0.026 | 0.075 | PRDM16        |
| cg15365305 | -0.021 | 0.076 | SMARCA2       |
| cg26122413 | -0.019 | 0.076 | INF2          |
| cg05141465 | -0.026 | 0.078 | CHST10        |
| cg10225499 | -0.031 | 0.079 | EZR           |
| cg17320669 | -0.026 | 0.080 | CAPN2         |
| cg19839415 | -0.022 | 0.080 | IFFO2         |
| cg03950655 | -0.020 | 0.084 | ROR1          |
| cg22029806 | -0.018 | 0.084 | CD47          |
| cg00634968 | 0.022  | 0.085 | PKHD1         |
| cg01053681 | -0.026 | 0.085 | ZMIZ1         |
| cg01118541 | 0.019  | 0.085 |               |
| cg03747028 | 0.011  | 0.085 | TAF12         |
| cg04964562 | -0.016 | 0.085 | PLCG1         |
| cg05526364 | -0.026 | 0.085 | IFT122        |
| cg05878289 | -0.023 | 0.085 | SORCS2        |
| cg06520014 | -0.016 | 0.085 |               |
| cg07077978 | -0.027 | 0.085 |               |
| cg15412087 | -0.023 | 0.085 | OAF           |
| cg16229161 | -0.019 | 0.085 | TNK2          |
| cg25119743 | -0.024 | 0.085 | CUGBP2        |
| cg00415704 | -0.025 | 0.086 | RGMA          |
| cg00726470 | -0.016 | 0.086 |               |
| cg01800445 | -0.035 | 0.086 | PRDM16        |
| cg12863924 | -0.026 | 0.086 |               |
| cg13153666 | -0.022 | 0.086 |               |
| cg18069081 | -0.024 | 0.086 | GPR39         |
| cg03272941 | -0.019 | 0.086 | RHOJ          |
| cg17823326 | -0.016 | 0.086 | NUBPL         |
| cg24186251 | -0.023 | 0.086 | SH3RF3        |
| cg26915329 | 0.023  | 0.086 |               |
| cg02986801 | -0.019 | 0.086 | ST3GAL1       |
| cg26051775 | -0.019 | 0.087 | CAPN2         |
| cg25307778 | -0.021 | 0.088 | ERI1          |
| cg00813147 | 0.019  | 0.088 | AMOTL2        |
| cg15763706 | -0.026 | 0.089 | SRGAP3        |
| cg08589214 | -0.023 | 0.089 | CAPN10        |
| cg12441066 | -0.025 | 0.089 | MSI2          |

|            |        |       |                      |
|------------|--------|-------|----------------------|
| cg14597213 | -0.021 | 0.089 | AHCYL1               |
| cg20988960 | -0.030 | 0.089 | PRDM16               |
| cg25619978 | 0.016  | 0.089 | TRPC7                |
| cg19055270 | 0.059  | 0.089 |                      |
| cg02133510 | -0.022 | 0.091 | TNXB                 |
| cg05026881 | 0.011  | 0.091 | TPSG1                |
| cg05112420 | -0.023 | 0.091 | BCR                  |
| cg05747038 | -0.019 | 0.091 | GLIS3                |
| cg07714715 | -0.026 | 0.091 | DENND1A              |
| cg13691436 | -0.023 | 0.091 | FRMD4A               |
| cg14229175 | -0.038 | 0.091 | IMPA2                |
| cg22177068 | -0.028 | 0.091 | ATP13A4-AS1; ATP13A4 |
| cg22738000 | -0.014 | 0.091 | RASSF4               |
| cg25456772 | 0.016  | 0.091 | RAB3IP               |
| cg13302567 | -0.025 | 0.093 | MAD1L1               |
| cg04844692 | -0.020 | 0.093 | C12orf49             |
| cg25122824 | -0.017 | 0.093 | MAD1L1               |
| cg26489368 | -0.022 | 0.093 | NKD2                 |
| cg07580832 | -0.021 | 0.094 | MSI2                 |
| cg08067895 | -0.023 | 0.094 | CDX1                 |
| cg09185640 | -0.018 | 0.094 | CORO2B               |
| cg09509365 | -0.020 | 0.094 | PRDM16               |
| cg09761288 | -0.023 | 0.094 |                      |
| cg09792192 | -0.017 | 0.094 | AHCYL2               |
| cg13547132 | -0.019 | 0.094 |                      |
| cg16326073 | -0.019 | 0.094 | PRR5                 |
| cg07410783 | -0.024 | 0.096 | CLEC16A              |
| cg14583999 | -0.030 | 0.096 | TMEM111              |
| cg17876641 | -0.025 | 0.096 | KIF21B               |
| cg00305491 | -0.026 | 0.096 | WWC1                 |
| cg05005073 | -0.034 | 0.097 |                      |
| cg05318384 | 0.021  | 0.098 |                      |
| cg08441850 | 0.030  | 0.098 | IKZF3                |
| cg05912181 | -0.018 | 0.098 | LOC100506497         |
| cg13904892 | -0.018 | 0.098 | C15orf62; DNAJC17    |
| cg01419991 | -0.022 | 0.098 | TRIB1                |
| cg05808227 | -0.023 | 0.099 |                      |
| cg02743070 | -0.018 | 0.099 | ZMIZ1                |
| cg24699097 | -0.016 | 0.100 | RAB11FIP4            |
